# Supplementary material for: In vivo assessment of the neural substrate linked with vocal imitation accuracy
Source: eLife. 2020 Mar 20;9:e49941. doi: 10.7554/eLife.49941 (PMC7083600; doi:10.7554/eLife.49941)
Supplement: Supplementary file 8. — This table summarises the results of the mixed-effect model analyses testing for an interaction between age (20-30-40 dph) and future good-bad learning outcome (n = 14 birds). The mixed-effect model includes a fixed effect for age and for learning outcome (good-bad), and a random factor for bird identity. The restricted Maximum Likelihood method was used to fit the data and significance was assessed using F-tests with the Kenward-Roger approximation. [file elife-49941-supp8.docx]

**Supplementary file 8: Summary of mixed-effect model.**

| **MRI parameter** | **Cluster-based ROI** | **Hemisphere** | **Interaction good-bad*age** | **Main effect good-bad** |
| --- | --- | --- | --- | --- |
| **FA** | **NCM** | Left | *p*=0.1146 *F(2,19.6)*=2.4242 | *p*=0.0003 *F(1,10.2)*=28.3681 |
| Right | *p*=0.0289 *F(2,19.4)*=4.2797 | *p*=0.2550 *F(1,10.1)*=1.4557 |
| **tFA** | Left | *p*=0.1378 *F(2,19.4)*=2.1989 | *p*=0.0998 *F(1,10.1)*=3.2809 |
| Right | *p*=0.0113 *F(2,19.2)*=5.7186 | *p*=0.1198 *F(1,10.1)*=2.8898 |
| **VP** |  | *p*=0.5908 *F(2,19.3)*=0.5409 | *p*=0.5856 *F(1,10.0)*=0.3173 |
| **log mwj** | **VP** |  | *p*=0.6713 *F(2,20.0)*=0.4066 | *p*=0.0463 *F(1,10.0)*=5.1686 |
| **CM** | Left | *p*=0.1188 *F(2,20.0)*=2.3740 | *p*=0.3280 *F(1,10.0)*=1.0577 |
| Right | *p*=0.4105 *F(2,20.0)*=0.9313 | *p*=0.5240 *F(1,10.0)*=0.4359 |
